# Supplementary material for: C-C motif chemokine receptor 1 (CCR1) is a target of the EGF-AKT-mTOR-STAT3 signaling axis in breast cancer cells
Source: PubMed Central journal article supplement (PMC5706898; doi:10.18632/oncotarget.21813), 2017-10-10
Supplement: oncotarget-08-94591-s001.pdf [file oncotarget-08-94591-s001.pdf]

## C-C motif chemokine receptor 1 (CCR1) is a target of the EGF-AKT-mTOR-STAT3 signaling axis in breast cancer cells

### SUPPLEMENTARY MATERIALS

Supplementary Table 1: Statistical analysis of CCR1 immunostaining intensity in breast tissue microarray data

|                     | Normal                              | IDC    | Normal vs IDC  |
|---------------------|-------------------------------------|--------|----------------|
| Number of values    | 178                                 | 178    | 178            |
| Minimum             | 0                                   | 0      | -3             |
| 25% Percentile      | 0                                   | 3      | 1.5            |
| Median              | 0                                   | 6      | 3              |
| 75% Percentile      | 3                                   | 8.25   | 6              |
| Maximum             | 6                                   | 9      | 9              |
| Mean RU             | 1.669                               | 5.781  | 4.112          |
| S.D.                | 1.886                               | 2.513  | 2.879          |
| S.E.M.              | 0.1413                              | 0.1884 | 0.2158         |
| Lower 95% CI        | 1.39                                | 5.409  | 3.686          |
| Upper 95% CI        | 1.947                               | 6.153  | 4.538          |
|                     | P value                             |        | <0.0001        |
|                     | P value summary                     |        | ****           |
| Paired t test       | Significantly different (P < 0.05)? |        | Yes            |
|                     | One- or two-tailed P value?         |        | Two-tailed     |
|                     | t, df                               |        | t=18.81 df=177 |
|                     | Correlation coefficient (r)         |        | 0.1594         |
| Pairing effectivity | P value (one tailed)                |        | 0.0168         |
|                     | P value summary                     |        | *              |
|                     | Pairing significant?                |        | Yes            |

IDC, breast invasive ductal carcinoma.

Normal, adjacent peripheral normal tissue.

RU, immunohistochemical staining intensity of CCR1 in relative unit.

S.D., standard deviation; S.E.M., standard error of mean.

CI, confidential interval.

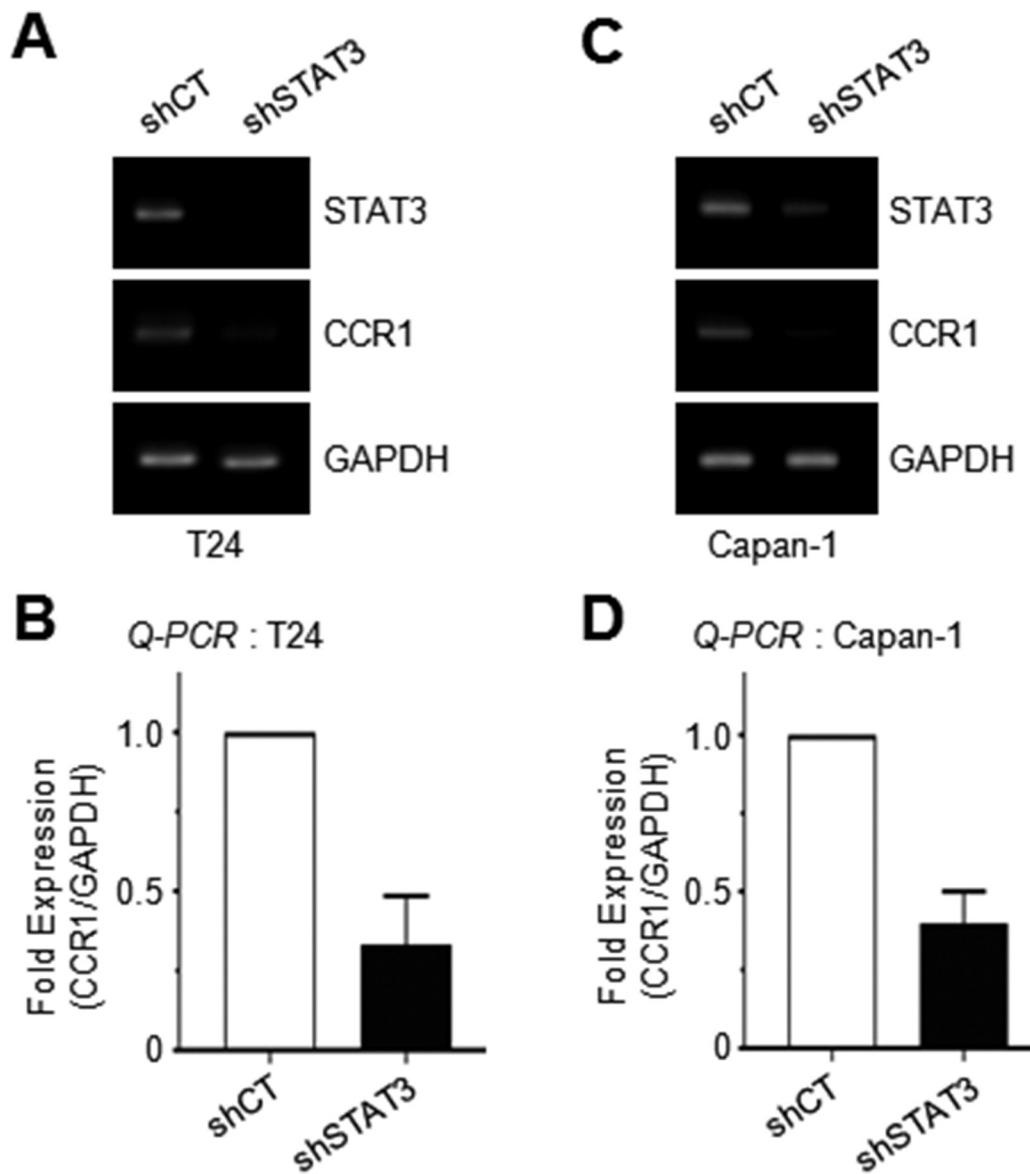

**Supplementary Figure 1: Effect of STAT3 silencing on CCR1 expression.** Total RNAs were extracted from T24 (A and B) and Capan-1 (C and D) cells and CCR1 mRNA levels were examined by RT-PCR (A and C) or quantitative real-time PCR (B and D). Data were presented as mean  $\pm$  SD ( $n = 3$ ).

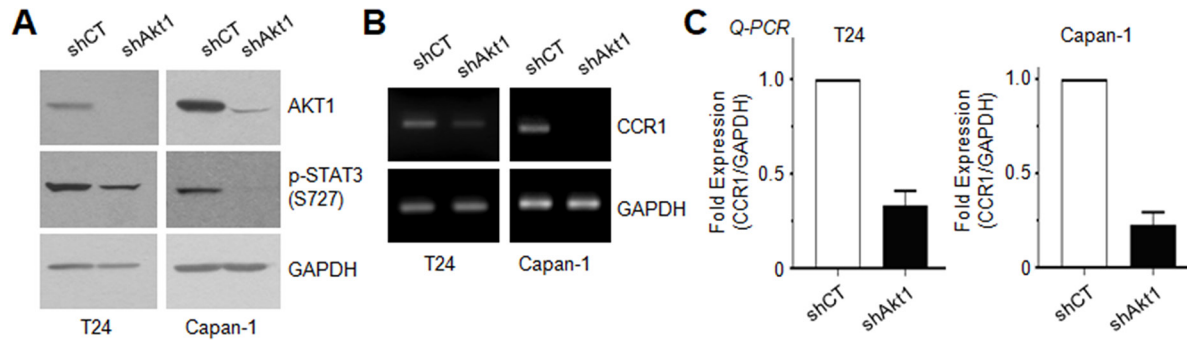

**Supplementary Figure 2: Effect of AKT1 silencing on the serine-727 phosphorylation of STAT3.** (A) Protein lysates were prepared from T24 or Capan-1 transfectants expressing control scrambled shRNA (shCT) or AKT1 shRNA (shAkt1). Immunoblot analysis was performed using AKT1 or phospho-STAT3 (Ser727) antibody. GAPDH was used as an internal control. (B) Total RNAs were extracted from T24 and Capan-1 transfectants, and CCR1 mRNA levels were examined by RT-PCR (B) or quantitative real-time PCR (C). Data are presented as means  $\pm$  SD ( $n = 3$ ).

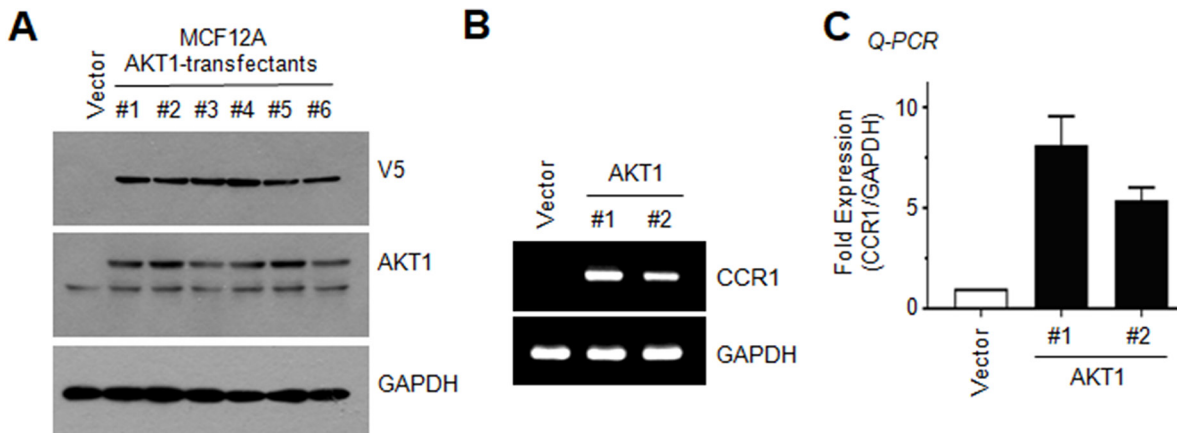

**Supplementary Figure 3: Effect of AKT1 expression on CCR1 expression.** (A) MCF12A cells were transfected with either empty vector or expression plasmid for V5-tagged AKT1 (clones #1 and #2). Cell lysates were prepared, and immunoblotting was performed with antibodies against V5 and AKT1. GAPDH served as an internal control. (B and C) Total RNAs were extracted and CCR1 mRNA levels were examined in MCF12A transfectants expressing AKT1 (clones #1 and #2) by RT-PCR (B) or by quantitative real-time (Q)-PCR (C). Values were normalized to GAPDH mRNA levels. Data are presented as means ± SD ( $n = 3$ ).
